# Supplementary material
Source: MDPI journal article supplement (https://www.mdpi.com/2311-553X/10/2/28)
Supplement: s1 [file s1]

Supplemental Table S1. Sequence information of 6 confirmed transcripts

| Name            | Sequence                                                                                                                                                                                                                                                                                                                                                                                                                                                                                                                                                                                                                                                                                                                    | Product Size (bp) |
|-----------------|-----------------------------------------------------------------------------------------------------------------------------------------------------------------------------------------------------------------------------------------------------------------------------------------------------------------------------------------------------------------------------------------------------------------------------------------------------------------------------------------------------------------------------------------------------------------------------------------------------------------------------------------------------------------------------------------------------------------------------|-------------------|
| HNFI1A-AS1-205N | CCAGGUCUCUGCUGGUCCCUAGGAAGCACUUUGACCUCUGCUUCCCCUUCA<br>AAUGCUGUGGAUCAAGCCUCCCCAACCCACCAUCCACCAAAGGGGGCUG<br>CUGACCGAGAGAGCUCACUCAGCCAGAGAUAGACGUAUUGCUAUGCUGUUUG<br>GGCUGGUCUUUGAACUCCUGGCCUCAAGCAAUCCUCCUACCUCGGCCUCCC<br>AAUGUGCUGGGAUUACAGGAUGAGGGCAAAGAGUUUAAGAUGGUGGAGC<br>CUUAUUAUGCAAAGGAACCCAAUCCAGCGUCCACUGGAAGAAGACUGCCC<br>AGGACUUCUACCUUCCCGGAACAUCUGCCCAGAGUCCACCAGCUGGAAGA<br>AGACUGCCCAGGACUUCUACCUUCCUGGGAACAUCUGCAUCAGACUCUGUG<br>GGUAGGGAAAUAAACCUUCAUUGUGUUCA                                                                                                                                                                                                                                            | 437               |
| HNFI1A-AS1-205  | CCAGGUCUCUGCUGGUCCCUAGGAAGCACUUUGACCUCUGCUUCCCCUUCA<br>AAUGCUGUGGAUCAAGCCUCCCCAACCCACCAUCCACCAAAGGGGGCUG<br>CUGACCGAGAGAGCUCACUCAGCCAGGAUGAGGGCAAAGAGUUUAAGAUG<br>GUGGAGCCUUUAUUGCAAAGGAACCCAAUCCAGCGUCCACUGGAAGAAG<br>ACUGCCCAGGACUUCUACCUUCCCGGAACAUCUGCCCAGAGUCCACCAGC<br>UGGAAGAAGACUGCCCAGGACUUCUACCUUCCUGGGAACAUCUGCAUCAGA<br>CUCUGUGGGGUAGGGAAAUAAACCUUCAUUGUGUUCA                                                                                                                                                                                                                                                                                                                                                   | 343               |
| HNFI1A-AS1-208  | AGCAUUAAGAAACCCAAUCGGGGCAGGCGGGAAGCACUCCAGCCUCCUU<br>GCAAGCUUGGGGCGCCUCAUUCUCUCCCGUGCCCCUUCUCCAGCUGGGUCU<br>GAGCCCCCGCCCCCUGGCUCUCCGUUCUGCUUCUCCAGCUUCUCUGUCC<br>AUCUCCCCCAAUGGCCUCUCUCUACACUCUCUGCCUCAGCUUCCAGGUCUCU<br>GCUGGUCCCUAGGAAGCACUUUGACCUCUGCUUCCCCUUCAAAUGCUGUGG<br>AUCAAGCCUCCCCAACCCACCAUCCACCAAAGGGGGCUGCUGACCGAGAG<br>AGCUCACUCAGCCAGAUUCCCCACCGAUGGCCAAGUGCCAGUUAGUCACGG<br>CCUCAGUGCAGCACCUCUAUCCUCCAGAAAGCCAUGGCUCUGGACUCCACC<br>CACUGAAACAGGGCUUUUGUGGGAAUACAAUGGGAACAAGAAGAAAAACA<br>UGCUGAACCUGAUCUCCAUGGGACCUGAUGUGGAGUCACGUUCAUUCACAU<br>CACUGGCUUGCAGCCUCUCCACUCACAAGUUAUUGAUAAUCGAAAAAUAA<br>AACACCAUGCGAUCGUA                                                                                    | 582               |
| HNFI1A-AS1-203  | GCGCCTCATTCTCTCCCGTGCCCTTCTCCCAGCTGGGTCTGAGCCCCGCCCC<br>CTGGCTCCTCCGTTCTGCTTCTCCCAGCTTCTCTGTCCATCTCCCCAATGGCCTC<br>TCTCTACACTCTCTGCCTCAGCTTCCAGGTCTCTGCTGGTCCCTAGGAAGCACTT<br>TGACCTCTGCTTCCCTTCAAATGCTGTGGATCAAGCCTCCCCAACCCACCAT<br>CCCACCAAAGGGGGTGCTGACCGAGAGAGCTCACTCAGCCAGCUGCUCCCU<br>CUACCUGGAAACCUCCAUUUGUCAAGCUGCUGCUGUCUUAAGAUCUACCU<br>GGUCAGAAUCUCCUGCUGUCCUCUUCUGCCACCCACAGCAAUGUGAGCCUU<br>CACUGGCUGGCCUCCCCUACUCACUGGAGCAGAGCUACGGCAUCAGAAUGC<br>CCUGGAGCAGGGGUAGAAACACAGAUUUCUGAGUCUACACUCGAAGAUUU<br>UUUUUUCUUUCUUCUUUUUUUUUUUGUUUUCCAAUUUUUCUAAUUUUAGAG<br>AUGGGGUCUCACCACGUUGCCCAGGCUGGUCUCAAGCUCCUGGACUCAGGU<br>CAUCCUACCACCUAGGCCUUCUAAAGUGUUAGGAUGAGCCUGAACCUUGU<br>AACAUAGAACAUUUAUUAUUAUUAUCUGGAAA | 659               |
| HNFI1A-AS1-203N | GCGCCTCATTCTCTCCCGTGCCCTTCTCCCAGCTGGGTCTGAGCCCCGCCCC<br>CTGGCTCCTCCGTTCTGCTTCTCCCAGCTTCTCTGTCCATCTCCCCAATGGCCTC<br>TCTCTACACTCTCTGCCTCAGCTTCCAGGTCTCTGCTGGTCCCTAGGAAGCACTT<br>TGACCTCTGCTTCCCTTCAAATGCTGTGGATCAAGCCTCCCCAACCCACCAT<br>CCCACCAAAGGGGGTGCTGACCGAGAGAGCTCACTCAGCCAGAGAGCCAGC<br>UGUUAAACACUAGCCAACCCCCAUUGAUGCUGUCCUUCUACCUGAAACA<br>CCUCGCAUUGCCCGUGCUCUCCUCUACCUGGAAACCUCCAUUUGUCAAGCUG<br>CUGCUGUCUUAAGAUCUACCUGGUCAGAAUCUCCUGCUGUCCUCUUCUGC<br>CACCCACAGCAAUGUGAGCCUUCACUGGCUGGCCUCCCCUACUCACUGGAG<br>CAGAGCUACGGCAUCAGAAUGCCCUGGAGCAGGGGUAGAAACACAGAUUU<br>CUGAGUCUACACUCGAAGAUUUUUUUUUUCUUUCUUUUUUUUUUUGUUU<br>UCCAAUUUUUCUAAUUUUAGAGAUGGGGUCUCACCACGUUGCCCAGGCUGG                                       | 732               |

HNF1A-AS1-204

2455

Exons are labeled in colors that match Fig.2 A.
